# Supplementary material for: Novel FeNi2S4/TMD-based ternary composites for supercapacitor applications
Source: Royal Society of Chemistry journal article supplement (doi:10.1039/c6ta03111k), 2016-01-01
Supplement: c6ta03111k1.pdf [file c6ta03111k1.pdf]

## Electronic Supplementary Information

### Novel $\text{FeNi}_2\text{S}_4$ /TMDs-based Ternary Composites for Supercapacitor Applications

Jianfeng Shen<sup>a</sup>, Jin Ji<sup>a</sup>, Pei Dong<sup>b</sup>, Robert Baines<sup>b</sup>, ZhuQing Zhang<sup>a</sup>, Pulickel M. Ajayan<sup>b\*</sup>, Mingxin Ye<sup>a\*</sup>

<sup>a</sup> Institute of special materials and technology, Fudan University, 200433, Shanghai, China

<sup>b</sup> Department of Materials Science and NanoEngineering, Rice University, 6100 Main Street, Houston, TX 77005, USA

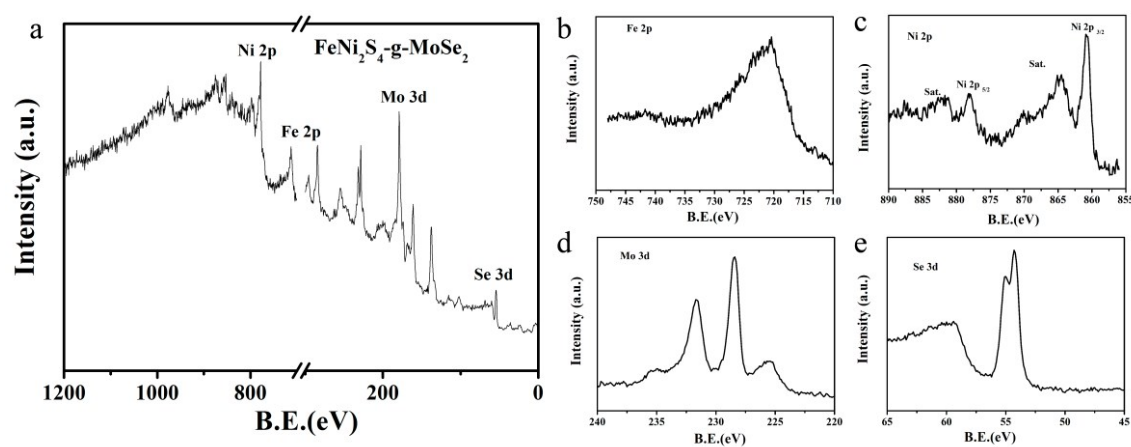

Figure S1. XPS survey spectrum of  $\text{FeNi}_2\text{S}_4$ -g- $\text{MoSe}_2$  (a). High-resolution XPS spectra of the Fe 2p (b), Ni 2p (c), Mo 3d (d) and Se 3d (e) of  $\text{FeNi}_2\text{S}_4$ -g- $\text{MoSe}_2$ .

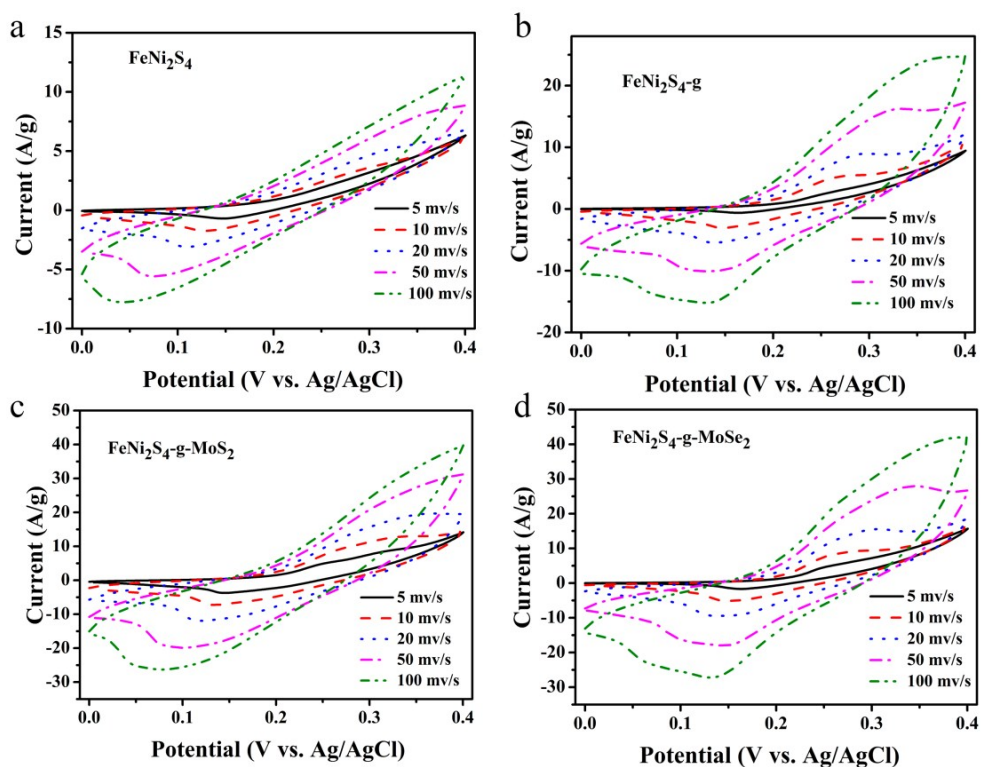

Figure S2. CV curves of  $\text{FeNi}_2\text{S}_4$ ,  $\text{FeNi}_2\text{S}_4\text{-g}$ ,  $\text{FeNi}_2\text{S}_4\text{-g-MoS}_2$  and  $\text{FeNi}_2\text{S}_4\text{-g-MoSe}_2$  at different scanning rates.

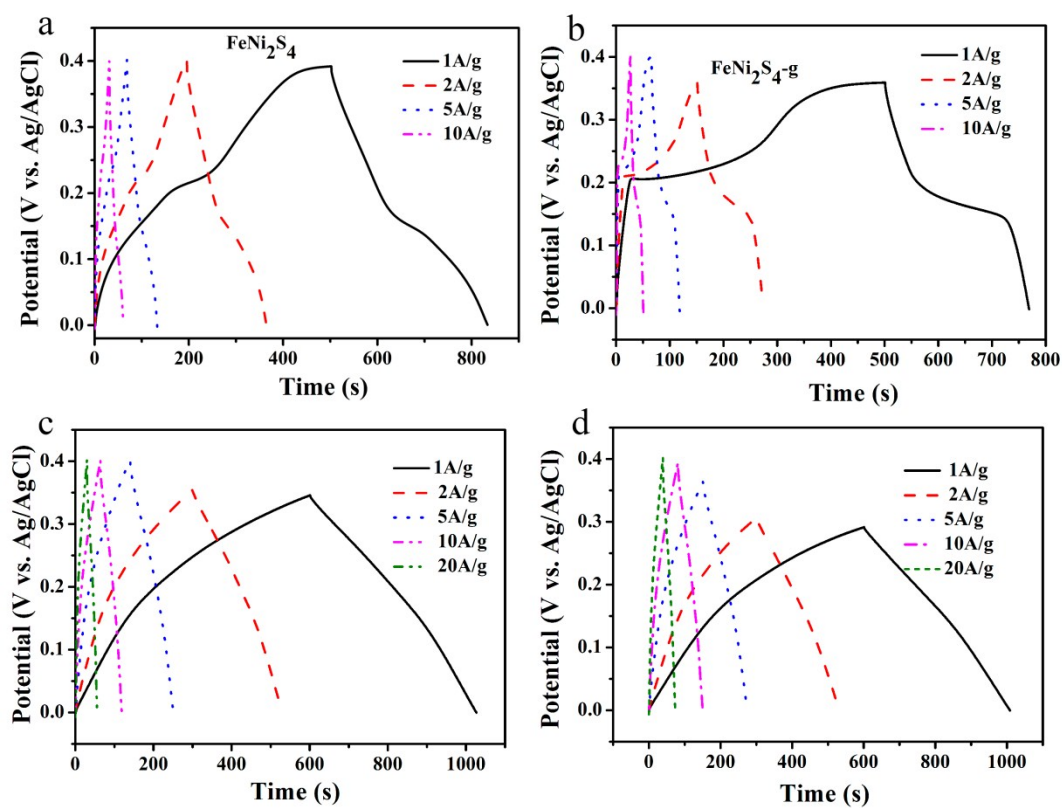

Figure S3. GCD curves of  $\text{FeNi}_2\text{S}_4$ ,  $\text{FeNi}_2\text{S}_4\text{-g}$ ,  $\text{FeNi}_2\text{S}_4\text{-g-MoS}_2$ , and  $\text{FeNi}_2\text{S}_4\text{-g-MoSe}_2$  at different current densities.

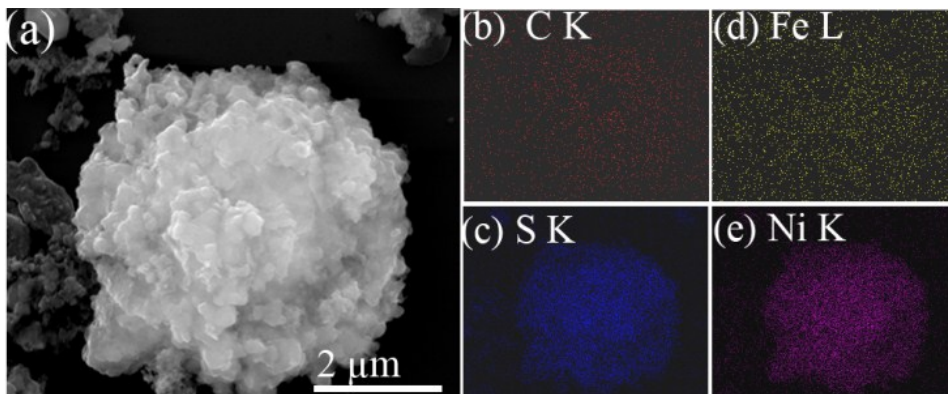

Figure S4. SEM-EDX mapping of FeNi<sub>2</sub>S<sub>4</sub>-g.

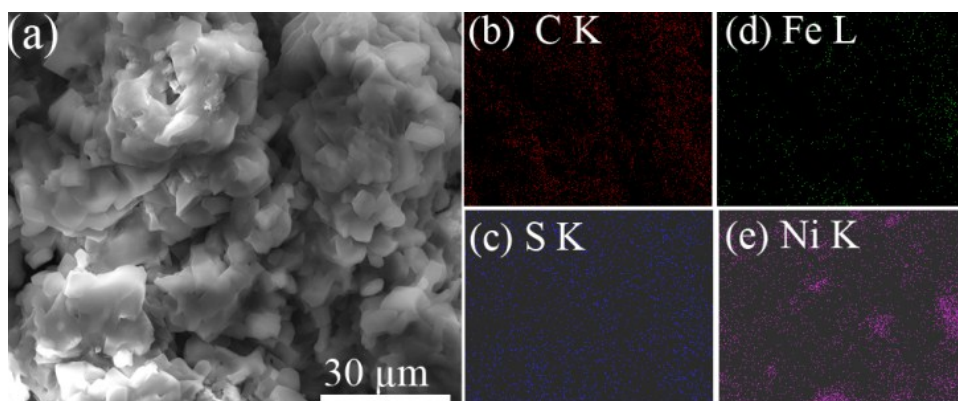

Figure S5. SEM-EDX mapping of FeNi<sub>2</sub>S<sub>4</sub>-g after cycling test.
